# Supplementary material for: Pomegranate peel as an Ecofriendly Reductant for Efficient Recovery of Cathode Materials from Spent Lithium ion Batteries through Organic Acid Leaching
Source: Research Square preprint supplement (doi:10.21203/rs.3.rs-5776294/v1), 2025-04-24
Supplement: Supplementary file 1 [file b539a1a220df8dba211173b3.docx]

**Effect of PP addition**

The impact of PP as a reducing agent on cathode of LIB leaching is illustrated in Figure S1. The experiments were conducted under identical conditions, including T: 95 °C, t: 320 min, and CH3COOH: 5.5 M. Figure S1 demonstrates that the dissolution efficiency of all elements in cathode of LIB increased with the addition of PP, resulting in a recovery increment of Ni, Co, Mn, and Li by 64.3%, 74.5%, 76.4%, and 27.6%, respectively. This outcome indicates that PP breaks the structure of the Li(NixCoyMnz)O2 compound and enhances the dissolution of its metals. A similar result was observed in Wu et al.'s research [1], where glucose was added as a reducing agent to achieve a leaching efficiency of over 95% for Ni, Co, Mn, and Li. However, without glucose or CH3COOH, the efficiency of Li leaching was relatively high, while the leaching of other metals was low even under sub-critical conditions (time:120 minutes; acid concentration:2 M; solid to liquid ratio:10 g/L; glucose:5 g/1). This finding suggests that efficient metal leaching requires glucose as a reducing agent, CH3COOH as a leaching agent, and subcritical conditions. Interestingly, the presence of PP, along with sufficient CH3COOH and optimal conditions, work synergistically without being inevitable.

Figure S1. The effect of the presence and absence of PP/LIB of 3.5 in the cathode leaching process of spent LIBs (T: 91.9 °C, t: 320 min, and CH3COOH: 5.5 M).

Kinetics evaluation by SCM

Figure S2. Kinetic data plot of LIB leaching based on the shrinking core model (SCM) model at four temperatures of 50, 65, 80, and 95 °C with chemical reaction mechanisms for (a) Ni, (b) Co, (c) Mn, and (d) Li. The parameters of CH3COOH concentration and PP/LIB ratio are considered as 5.5 M and 3.5, respectively, based on the results of optimal conditions. A kinetic model should be chosen when the correlation coefficient (R2) is near one, and the model should also be practically justifiable. For example, when a product layer does not form during leaching, choosing the diffusion model through the product layer, despite a higher R2, is justified. Therefore, both conditions of R2 are close to one and practical justifiability should be considered when selecting a model.

Considering that the diffusion through the liquid film model is formed under conditions where the liquid is very dense, and the movement of ions in it is difficult. Also, if the diffusion through the liquid film is the controlling step, increasing the stirring speed significantly affects the dissolution rate [2]. However, an increase in stirring speed has a minimal effect on the dissolution rate during the initial experiments. Therefore, for each of the four elements, Ni, Co, Mn, and Li, this mechanism cannot be considered as the kinetic controlling step under the mentioned conditions. Conversely, based on the dissolution reactions of the elements within the LIB cathode, a solid product layer does not develop in the leaching process. Consequently, using the diffusion mechanism through the product layer as the primary model for elucidating the dissolution mechanism is not applicable. The only mechanism that can be justified under practical conditions, considering the dissolution reactions, is the chemical reaction model. Upon close examination of the R2 values in Figures S2-a (for Ni), S2-c (for Mn), and S2-d (for Li), it becomes evident that there is a lack of consistency in the values and some of them are far from 1.0. Specifically, in the case of Ni, the correlation coefficients for dissolving nickel in a CH3COOH environment varied from 0.76 to 0.97. Consequently, the shrinking core model is not suitable for explaining the leaching mechanism for Ni, Mn, and Li. Nevertheless, examining the results of Co dissolution reveals that the R2 for the chemical reaction model exceeds 0.96 (Figure S2-b). Therefore, this model can be considered as the initial investigation for Co dissolution mechanism. However, for the simplicity of mechanisms and utilization all four elements as well, another model was also examined.Top of Form

Top of Form

Therefore, the Avrami model, one of the most common models in LIB cathode leaching, was investigated for all elements.

Figure S2. Kinetic data plot of LIB leaching based on the shrinking core model (SCM) model at four temperatures of 50, 65, 80, and 95 °C with chemical reaction mechanisms for (a) Ni, (b) Co, (c) Mn, and (d) Li.

References:

[1] Wu Z, Soh T, Chan JJ, Meng S, Meyer D, Srinivasan M, et al. Repurposing of Fruit Peel Waste as a Green Reductant for Recycling of Spent Lithium-Ion Batteries. Environ Sci Technol 2020;54:9681–92. https://doi.org/10.1021/acs.est.0c02873.

[2] Deng Q, Pan D, Liu G, Yang F, Pan J. Leaching Br from high bromine containing circuit board smelting flue dust by sodium hydroxide solution: thermodynamics and kinetics study. Journal of Materials Research and Technology 2020;9:8675–84. https://doi.org/10.1016/j.jmrt.2020.06.005.
